# Supplementary material for: Using Normalized Carcinoembryonic Antigen and Carbohydrate Antigen 19 to Predict and Monitor the Efficacy of Neoadjuvant Chemotherapy in Locally Advanced Gastric Cancer
Source: Int J Mol Sci. 2023 Jul 29;24(15):12192. doi: 10.3390/ijms241512192 (PMC10418931; doi:10.3390/ijms241512192)
Supplement: Supplementary file 1 [file ijms-24-12192-s001.zip]

Archive with 4 entries (4 files):
- Supplementary Figure 1.pdf
- Supplementary table 1.pdf
- Supplementary table 2.pdf
- Supplementary table 3.pdf
