# Supplementary material for: Using Normalized Carcinoembryonic Antigen and Carbohydrate Antigen 19 to Predict and Monitor the Efficacy of Neoadjuvant Chemotherapy in Locally Advanced Gastric Cancer
Source: Int J Mol Sci. 2023 Jul 29;24(15):12192. doi: 10.3390/ijms241512192 (PMC10418931; doi:10.3390/ijms241512192)
Supplement: Supplementary file 1 [file ijms-24-12192-s001.zip › Supplementary table 1.pdf]

**Table S1. Data of clinicopathological information in patients with or without postoperative CEA/CA19-9 normalization**

| Characteristics                 | Normalization<br>(n=73) | Non-normalization<br>(n=59) | p value |
|---------------------------------|-------------------------|-----------------------------|---------|
| Age in years, median<br>(range) | 61 (36-82)              | 62 (45-86)                  | 0.916   |
| Gender                          |                         |                             | 0.741   |
| Male, n (%)                     | 59 (80.8)               | 49 (83.1)                   |         |
| Female, n (%)                   | 14 (19.2)               | 10 (16.9)                   |         |
| BMI (median)                    |                         |                             | 0.220   |
| < median, n (%)                 | 33 (45.2)               | 33 (55.9)                   |         |
| > median, n (%)                 | 40 (54.8)               | 26 (44.1)                   |         |
| Location                        |                         |                             | 0.827   |
| Upper, n (%)                    | 30 (41.1)               | 25 (42.4)                   |         |
| Middle, n (%)                   | 11 (15.1)               | 8 (13.6)                    |         |
| Lower, n (%)                    | 31 (42.5)               | 26 (44.1)                   |         |
| Total, n (%)                    | 1 (1.4)                 | 0 (0.0)                     |         |
| Diameter                        |                         |                             | 0.054   |
| < median, n (%)                 | 42 (57.5)               | 24 (40.7)                   |         |
| > median, n (%)                 | 31 (42.5)               | 35 (59.3)                   |         |
| Differentiation                 |                         |                             | 0.629   |
| Differential                    | 34 (46.6)               | 25 (42.4)                   |         |
| Undifferential                  | 39 (53.4)               | 34 (57.6)                   |         |
| cT stage                        |                         |                             | 0.621   |
| T1-T2, n (%)                    | 1 (1.4)                 | 2 (3.4)                     |         |
| T3, n (%)                       | 26 (35.6)               | 18 (30.5)                   |         |
| T4, n (%)                       | 46 (64.0)               | 39 (66.1)                   |         |
| cN stage                        |                         |                             | 0.464   |
| N0, n (%)                       | 8 (11.0)                | 4 (6.8)                     |         |
| N1, n (%)                       | 24 (32.9)               | 14 (23.7)                   |         |
| N2, n (%)                       | 28 (38.4)               | 27 (45.8)                   |         |
| N3, n (%)                       | 13 (17.8)               | 14 (23.7)                   |         |
| cTNM stage                      |                         |                             | 0.892   |
| II, n (%)                       | 9 (12.3)                | 6 (10.2)                    |         |
| III, n (%)                      | 60 (82.2)               | 49 (83.1)                   |         |
| IV, n (%)                       | 4 (5.5)                 | 4 (6.8)                     |         |

BMI, body mass index.
