# Supplementary material for: Using Normalized Carcinoembryonic Antigen and Carbohydrate Antigen 19 to Predict and Monitor the Efficacy of Neoadjuvant Chemotherapy in Locally Advanced Gastric Cancer
Source: Int J Mol Sci. 2023 Jul 29;24(15):12192. doi: 10.3390/ijms241512192 (PMC10418931; doi:10.3390/ijms241512192)
Supplement: Supplementary file 1 [file ijms-24-12192-s001.zip › Supplementary table 2.pdf]

**Table S2. Proportional hazards model for normalization in CEA or/and CA19-9 following NACT (n = 132)**

|                                                | Univariable |           |         | Multivariable |           |         |
|------------------------------------------------|-------------|-----------|---------|---------------|-----------|---------|
|                                                | HR          | 95% CI    | p Value | HR            | 95% CI    | p Value |
| Age (ref: ≤median)                             | 1.02        | 0.99-1.05 | 0.079   | 1.03          | 1.00-1.05 | 0.036*  |
| Gender (ref: female)                           | 1.13        | 0.63-2.04 | 0.674   | -             | -         | -       |
| BMI (ref: ≤median)                             | 1.00        | 0.99-1.01 | 0.222   | -             | -         | -       |
| Location (ref: Lower)                          | 1.05        | 0.82-1.36 | 0.695   | -             | -         | -       |
| Differentiation<br>(ref:Undifferential)        | 0.65        | 0.41-1.04 | 0.073   | 0.64          | 0.40-1.04 | 0.069   |
| ypT (ref: T1-2)                                | 1.16        | 0.93-1.43 | 0.186   | -             | -         | -       |
| ypN (ref: N0)                                  | 1.17        | 0.97-1.42 | 0.102   | -             | -         | -       |
| ypTNM stage (ref: II stage)                    | 1.30        | 0.97-1.75 | 0.075   | 1.18          | 0.87-1.58 | 0.287   |
| TRG (ref: non-MPR)                             | 1.30        | 0.99-1.70 | 0.052   | 1.18          | 0.89-1.57 | 0.260   |
| Normalized CEA/CA19-9 (ref:<br>non-normalized) | 0.52        | 0.32-0.84 | 0.007** | 0.59          | 0.36-0.97 | 0.039*  |

BMI, body mass index; TRG, tumor regression grading; MPR, major pathological response; NACT, neoadjuvant chemotherapy. \* $p < 0.05$ , \*\* $p < 0.01$ .
