# Supplementary material for: Using Normalized Carcinoembryonic Antigen and Carbohydrate Antigen 19 to Predict and Monitor the Efficacy of Neoadjuvant Chemotherapy in Locally Advanced Gastric Cancer
Source: Int J Mol Sci. 2023 Jul 29;24(15):12192. doi: 10.3390/ijms241512192 (PMC10418931; doi:10.3390/ijms241512192)
Supplement: Supplementary file 1 [file ijms-24-12192-s001.zip › Supplementary table 3.pdf]

**Table S3. Serum tumor biomarkers of treatment response to neoadjuvant therapy in gastric cancer patients**

| Study       | Biomarker                              | Biomarker status in responders                                                                                                                                                 | NACT regimen                       | PR definition | PMID     |
|-------------|----------------------------------------|--------------------------------------------------------------------------------------------------------------------------------------------------------------------------------|------------------------------------|---------------|----------|
| Li et al.   | CEA                                    | No significant association was detected                                                                                                                                        | FLEEOX                             | pCR           | 29670115 |
| Chen et al. | CEA<br>CA19-9<br>CA125<br>CA153<br>AFP | Higher CEA level was associated with higher rate of pCR.                                                                                                                       | mFLOT,<br>FOLFOX,<br>XELOX,<br>SOX | pCR           | 32476803 |
| Ohe et al.  | CEA<br>CA19-9<br>CA125<br>AFP          | No significant association was detected                                                                                                                                        | mDCS                               | JCGC (2-3)    | 32110104 |
| Sun et al.  | CEA<br>CA19-9<br>CA724<br>CA125        | High pretreatment CEA levels (>50 ng/ml) may predict clinical disease progression after NACT. The decrease of tumor markers CEA, CA72-4, and CA125 was significant after NACT. | FOLFOX                             | CR+PR+SD      | 25543664 |
| Our study   | CEA<br>CA19-9                          | Normalization of CEA/CA19-9 is the strongest predictive marker for treatment response of NACT in LAGC                                                                          | XELOX,<br>SOX,<br>mFOLFOX7         | pCR + MPR     | -        |

**Abbreviations:** CEA, carcinoembryonic antigen; CA-125, cancer antigen 125; CA 19-9, cancer antigen 19-9; CA-153, cancer antigen 153; AFP, alfa-fetoprotein; FLEEOX, fluorouracil/leucovorin/etoposide/oxaliplatin/epirubicin; FOLFOX, leucovorin/fluorouracil/oxaliplatin; XELOX, capecitabine/oxaliplatin; MFLOT, fluorouracil/leucovorin/oxaliplatin/docetaxel; SOX, S-1/oxaliplatin; mDCS, docetaxel/cisplatin/S-1; NACT, neoadjuvant chemotherapy; pR, pathological response; pCR, pathological complete response; JCGC, Japanese Classification of Gastric Cancer;

\*P-values are presented only for values < 0.05.
